# Supplementary material for: Selective aerobic oxidation of 5-hydroxymethylfurfural to 2,5-furandicarboxylic acid over nanojunctions of cobalt–ceria binary oxide in water
Source: Royal Society of Chemistry journal article supplement (doi:10.1039/d2cy00110a), 2022-01-01
Supplement: d2cy00110a1.pdf [file d2cy00110a1.pdf]

## SUPPLEMENTAL INFORMATION

### Selective aerobic oxidation of 5-hydroxymethylfurfural to 2,5-furandicarboxylic acid over nanojunctions of cobalt–ceria binary oxide in water

Aicheng Chen <sup>a#</sup>, Tingting Li <sup>a#</sup>, Qian Zhang <sup>a</sup> and Hu Zhu <sup>a,b\*</sup>

<sup>a</sup> Engineering Research Center of Industrial Biocatalysis, Fujian Province University, Fujian Provincial Key Laboratory of Advanced Materials Oriented Chemical Engineering, Fujian Provincial Key Laboratory of Polymer Materials, College of Chemistry and Materials Science, Fujian Normal University, Fuzhou, P.R. China

<sup>b</sup> College of Chemical Engineering and Materials Science, Quanzhou Normal University, Quanzhou, P.R. China

---

\* Corresponding author: Hu Zhu, zhuhu@fjnu.edu.cn

# These two authors contributed equally to this work.

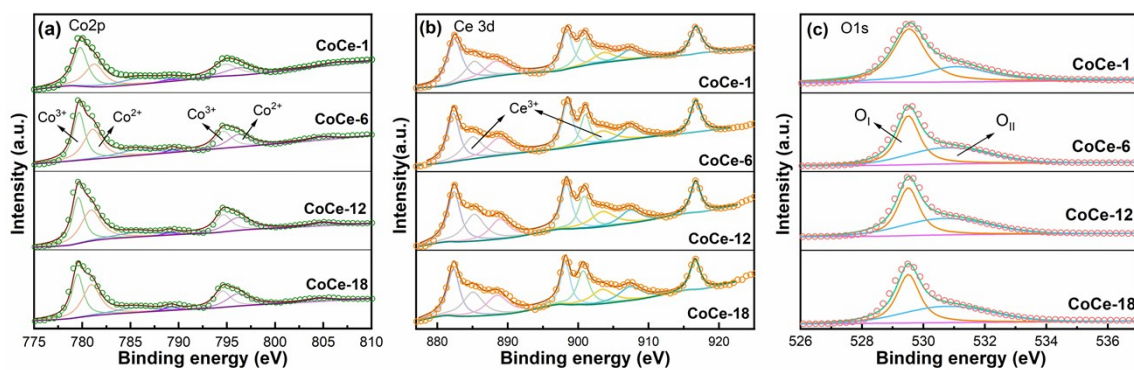

**Fig. S1** XPS spectra of Co 2p (a), Ce 3d (b) and O 1s (c) for various catalysts

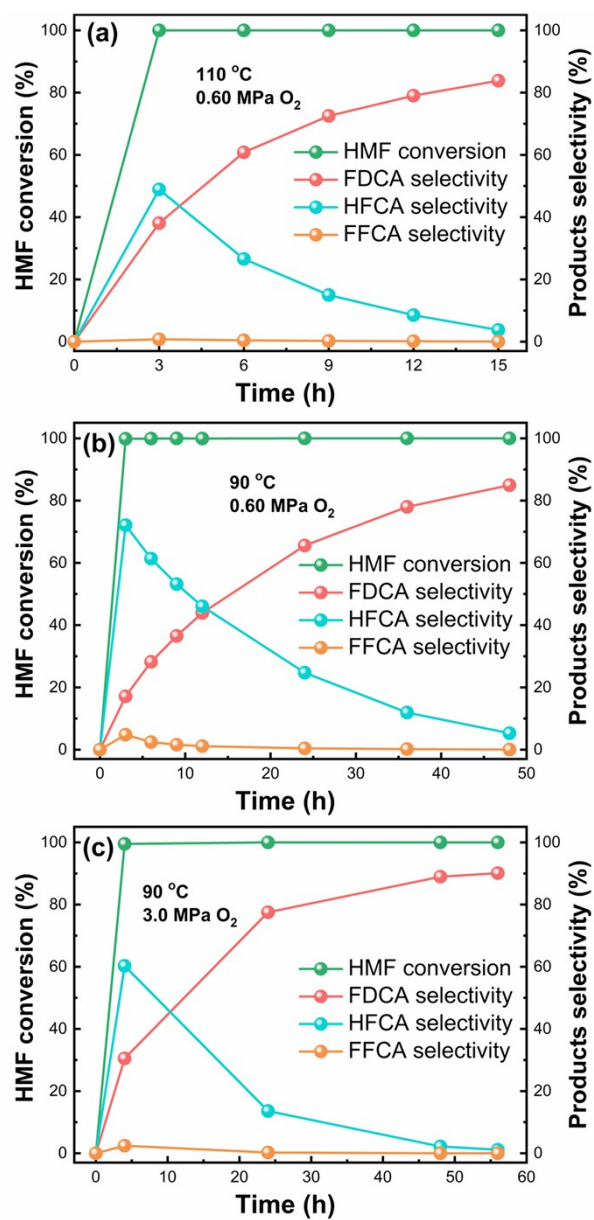

**Fig. S2** Influence of reaction time on the aerobic oxidation of HMF over the CoCe-15 catalyst at different reaction conditions

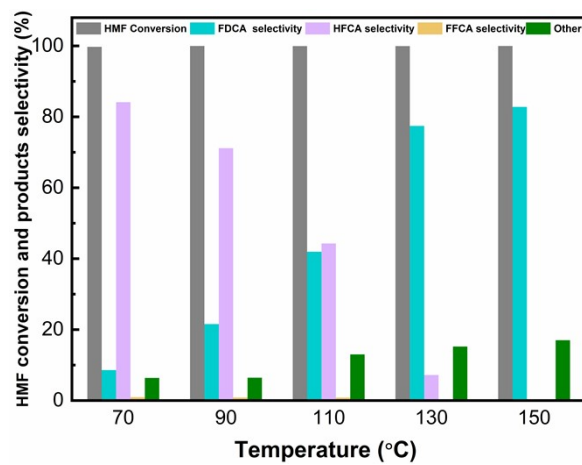

**Fig. S3** Influence of reaction temperature on the aerobic oxidation of HMF over the CoCe-15 catalyst at 0.6 MPa O<sub>2</sub> pressure and various temperature for 4 h

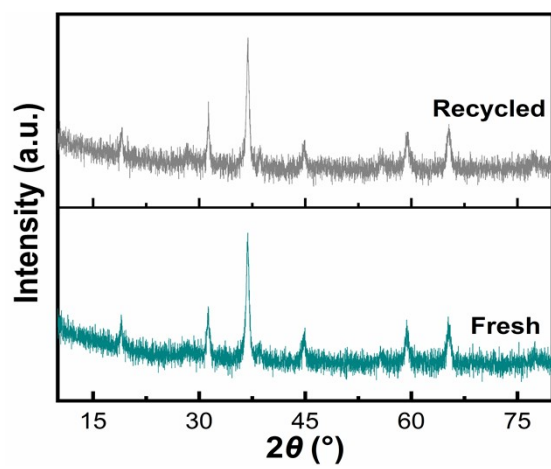

**Fig. S4** XRD patterns for the fresh and recycled CoCe-15

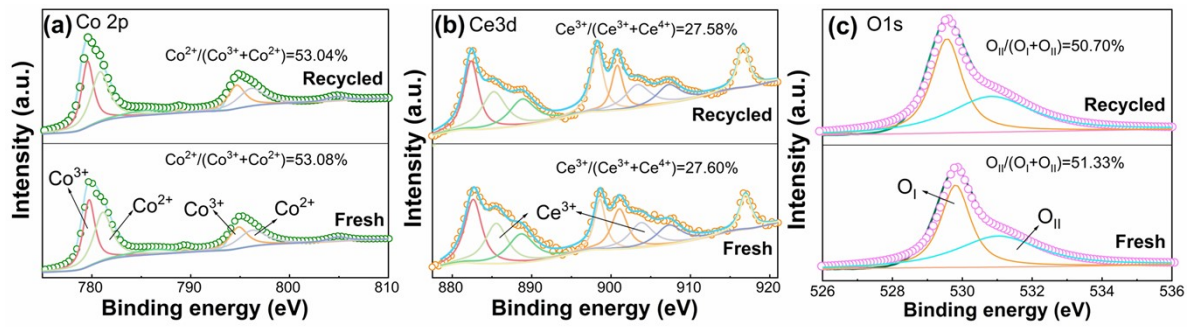

**Fig. S5** XPS spectra of Co 2p (a), Ce 3d (b), and O 1s (c) for the fresh and recycled CoCe-15

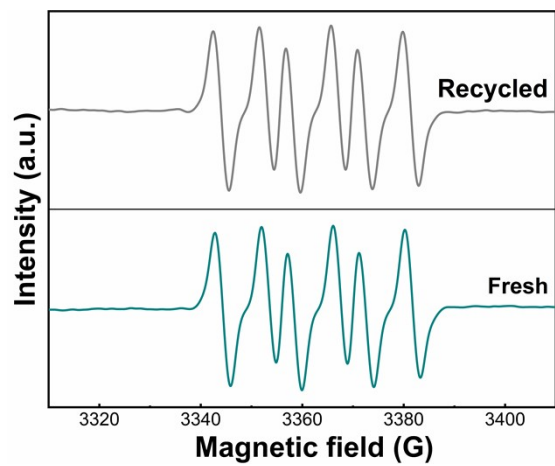

**Fig. S6** EPR spectra for the fresh and recycled CoCe-15

**Table S1** The relative surface proportion of Co, Ce and O species at their different valence states in various catalysts.

| Catalyst                       | O <sub>II</sub> /(O <sub>I</sub> +O <sub>II</sub> ) | Co <sup>2+</sup> /(Co <sup>3+</sup> +Co <sup>2+</sup> ) | Ce <sup>3+</sup> /(Ce <sup>3+</sup> +Ce <sup>4+</sup> ) |
|--------------------------------|-----------------------------------------------------|---------------------------------------------------------|---------------------------------------------------------|
| Co <sub>3</sub> O <sub>4</sub> | 45.54%                                              | 48.71%                                                  | —                                                       |
| CoCe-21                        | 46.00%                                              | 50.79%                                                  | 18.68%                                                  |
| CoCe-18                        | 48.40%                                              | 52.11%                                                  | 24.79%                                                  |
| CoCe-15                        | 51.33%                                              | 53.08%                                                  | 27.60%                                                  |
| CoCe-12                        | 49.59%                                              | 52.76%                                                  | 26.85%                                                  |
| CoCe-9                         | 47.15%                                              | 51.39%                                                  | 25.49%                                                  |
| CoCe-6                         | 46.27%                                              | 48.79%                                                  | 23.72%                                                  |
| CoCe-1                         | 38.92%                                              | 43.26%                                                  | 18.96%                                                  |
| CeO <sub>2</sub>               | 37.96%                                              | —                                                       | 15.06%                                                  |

All data were calculated from the relative intensities of the corresponding XPS peaks.



**Table S2** Comparison on catalytic performances of cheap metal oxide catalysts for the aerobic oxidation of HMF to FDCA in basic system

| Catalyst                                             | Oxidant                | Additive                    |               | Temp. (°C) | Time (h) | Conv. (%) | FDCA Yield (%) | Apparent reaction rate<br>( $\text{mmol}_{\text{FDCA}} \text{g}_{\text{cat}}^{-1} \text{MPa}_{\text{O}_2}^{-1} \text{h}^{-1}$ ) | Ref.      |
|------------------------------------------------------|------------------------|-----------------------------|---------------|------------|----------|-----------|----------------|---------------------------------------------------------------------------------------------------------------------------------|-----------|
|                                                      |                        | Dosage                      | Concentration |            |          |           |                |                                                                                                                                 |           |
| CoCe-15                                              | 0.6 MPa O <sub>2</sub> | 4 equiv. NaOH               | 0.027 M       | 130        | 4        | 100       | 77.4           | 0.143                                                                                                                           | This work |
| Co-Mn-0.25                                           | 1 MPa O <sub>2</sub>   | 2 equiv. NaHCO <sub>3</sub> | 0.10 M        | 120        | 5        | 99        | 95.2           | 0.950                                                                                                                           | S1        |
| Ni-MnO <sub>x</sub>                                  | 0.8 MPa O <sub>2</sub> | 4 equiv. NaHCO <sub>3</sub> | 0.40 M        | 100        | 28       | 100       | 93.8           | 0.419                                                                                                                           | S2        |
| MOF-Mn <sub>2</sub> O <sub>3</sub>                   | 1.4 MPa O <sub>2</sub> | 3 equiv. NaHCO <sub>3</sub> | 0.15 M        | 100        | 24       | 100       | 99.5           | 0.197                                                                                                                           | S3        |
| MnO <sub>x</sub> -CeO <sub>2</sub>                   | 2.0 MPa O <sub>2</sub> | 2 equiv. KHCO <sub>3</sub>  | 0.10 M        | 110        | 12       | 98.5      | 88.7           | 0.185                                                                                                                           | S4        |
| β-MnO <sub>2</sub> -HS                               | 1 MPa O <sub>2</sub>   | 3 equiv. NaHCO <sub>3</sub> | 0.12 M        | 100        | 24       | 99        | 86             | 0.143                                                                                                                           | S5        |
| Mn <sub>0.75</sub> Fe <sub>0.25</sub>                | 0.8 MPa O <sub>2</sub> | 4 equiv. NaOH               | 0.40 M        | 100        | 24       | 93        | 29.8           | 0.310                                                                                                                           | S6        |
| Activated MnO <sub>2</sub>                           | 1 MPa O <sub>2</sub>   | 3 equiv. NaHCO <sub>3</sub> | 0.12 M        | 100        | 24       | 99        | 74             | 0.123                                                                                                                           | S5        |
| Ce <sub>0.5</sub> Bi <sub>0.5</sub> O <sub>2-6</sub> | 1 MPa O <sub>2</sub>   | 4 equiv. NaOH               | 0.10 M        | 65         | 1        | 100       | 8              | 0.120                                                                                                                           | S7        |
| MnO <sub>2</sub>                                     | 1 MPa O <sub>2</sub>   | 3 equiv. NaHCO <sub>3</sub> | 0.12 M        | 100        | 24       | 99        | 91             | 0.076                                                                                                                           | S8        |
| MnCo <sub>2</sub> O <sub>4</sub>                     | 1 MPa O <sub>2</sub>   | 3 equiv. KHCO <sub>3</sub>  | 0.12 M        | 100        | 24       | 99.5      | 70.9           | 0.059                                                                                                                           | S9        |
| SrMnO <sub>3</sub>                                   | 1 MPa O <sub>2</sub>   | 3 equiv. NaHCO <sub>3</sub> | 0.12 M        | 100        | 24       | 99        | 58             | 0.048                                                                                                                           | S8        |

**Table S3** Properties of the recycled catalyst of CoCe-15

| Catalyst         | BET surface area (m <sup>2</sup> g <sup>-1</sup> ) | Pore volume (cm <sup>3</sup> g <sup>-1</sup> ) | Average pore size (nm) | Crystallite size <sup>a</sup> (nm) |                  |
|------------------|----------------------------------------------------|------------------------------------------------|------------------------|------------------------------------|------------------|
|                  |                                                    |                                                |                        | Co <sub>3</sub> O <sub>4</sub>     | CeO <sub>2</sub> |
| CoCe-15-recycled | 42.8                                               | 0.28                                           | 26.2                   | 21.4                               | —                |

<sup>a</sup> Calculated by Scherrer equation based on the XRD principal peak at 36.8 ° and 28.5 ° for Co<sub>3</sub>O<sub>4</sub> and CeO<sub>2</sub>, respectively.

## References

- S1. K. T. V. Rao, J. L. Rogers, S. Souzanchi, L. Dessbesell, M. B. Ray and C. Xu, *ChemSusChem*, 2018, **11**, 3323-3334.
- S2. K. Yu, Y. Liu, D. Lei, Y. Jiang, Y. Wang, Y. Feng, L.-L. Lou, S. Liu and W. Zhou, *Catal. Sci. Technol.*, 2018, **8**, 2299-2303.
- S3. L. Bao, F. Z. Sun, G. Y. Zhang and T.-L. Hu, *ChemSusChem*, 2020, **13**, 548-555.
- S4. X. Han, C. Li, X. Liu, Q. Xia and Y. Wang, *Green Chem.*, 2017, **19**, 996-1004.
- S5. E. Hayashi, Y. Yamaguchi, K. Kamata, N. Tsunoda, Y. Kumagai, F. Oba and M. Hara, *J. Am. Chem. Soc.*, 2019, **141**, 890-900.
- S6. F. Neațu, R. S. Marin, M. Florea, N. Petrea, O. D. Pavel and V. I. Pârvulescu, *Appl. Catal. B: Environ.*, 2016, **180**, 751-757.
- S7. Z. Miao, Y. Zhang, X. Pan, T. Wu, B. Zhang, J. Li, T. Yi, Z. Zhang and X. Yang, *Catal. Sci. Technol.*, 2015, **5**, 1314-1322.
- S8. E. Hayashi, T. Komanoya, K. Kamata and M. Hara, *ChemSusChem*, 2017, **10**, 654-658.
- S9. S. Zhang, X. Sun, Z. Zheng and L. Zhang, *Catal. Commun.*, 2018, **113**, 19-22.
